# Supplementary material for: Monodispersed uranium atomic site on carbonaceous materials
Source: Royal Society of Chemistry journal article supplement (doi:10.1039/d5ra03434e), 2025-01-01
Supplement: d5ra03434e1.pdf [file d5ra03434e1.pdf]

# Monodispersed uranium atomic site on carbonaceous materials

Yadong Li<sup>a</sup>, Yifei Dang<sup>a</sup>, Meng Jin<sup>a</sup>, Yuan Hu\*<sup>a</sup>, and Kecheng Cao\*<sup>a</sup>

<sup>a</sup> Shanghai Key Laboratory of High-Resolution Electron Microscopy, School of Physical Science and Technology, ShanghaiTech University, Shanghai 201210, China.

\* Corresponding authors, E-mail: caokch@shanghaitech.edu.cn,

huyuan@shanghaitech.edu.cn

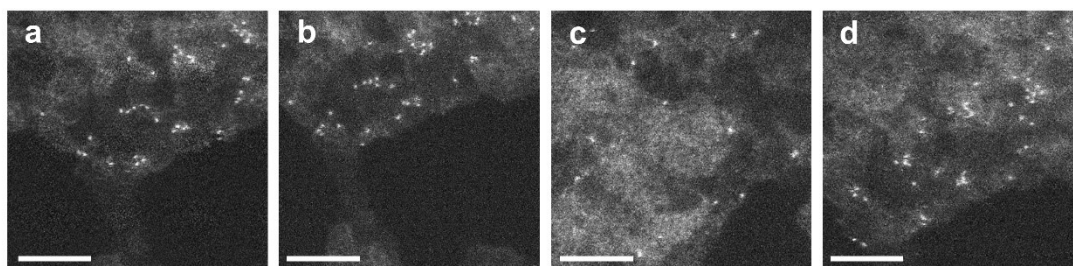

Figure. S1 STEM-HAADF images of four typical examples showing monodispersed uranium atomic site formed on amorphous carbon instead of graphene. Scale bar = 5

nm

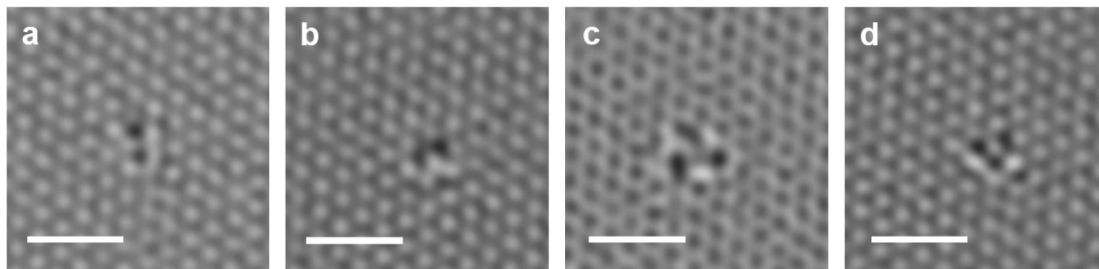

Figure. S2. Examples of uranium atom configuration on graphene in TEM mode after applying a mask. Scale bar = 1 nm

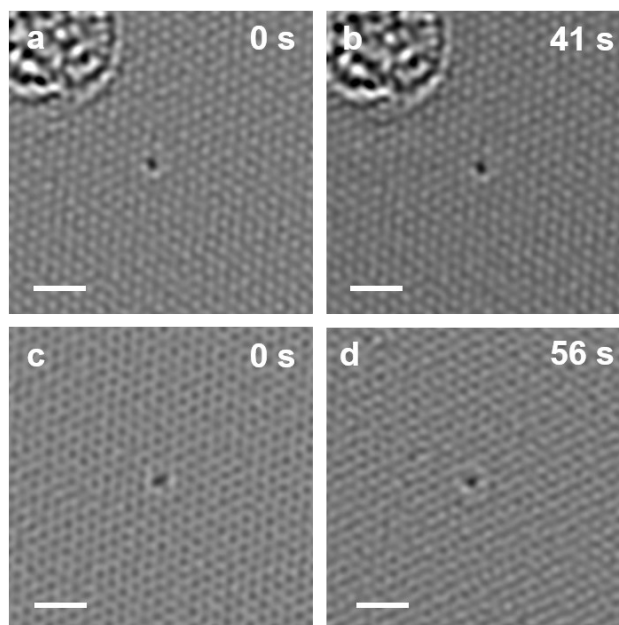

Figure. S3. Stability of single-atom uranium located at the hollow site and top site of carbon atom of perfect graphene. Scale bar = 1 nm

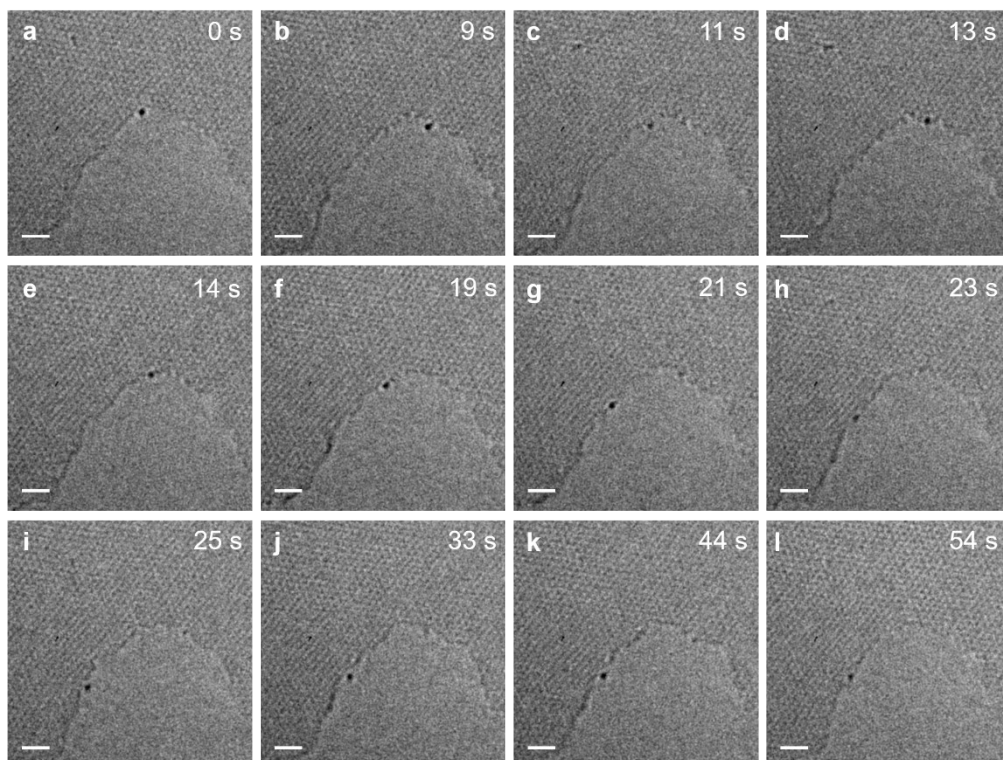

Figure. S4 Example of the movement of uranium atoms at the edge of graphene under electron beam irradiation. Scale bar = 1 nm

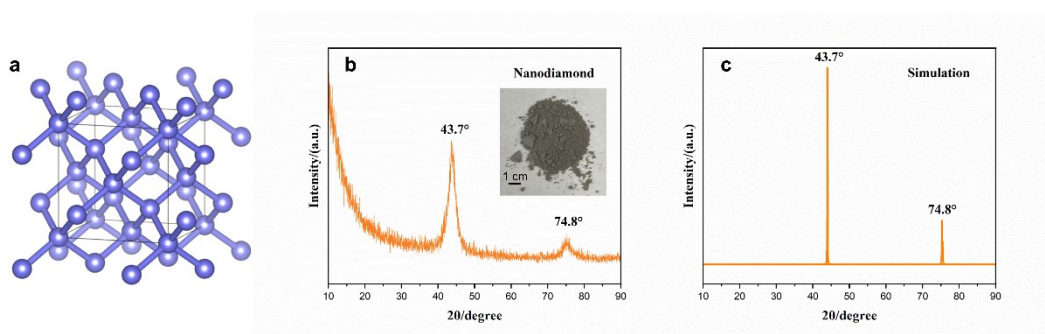

Figure S5: Lattice structure and XRD experimental and simulated spectra of nanodiamonds: (a) Lattice structure stick model; (b) XRD experimental diagram; (c) XRD simulation diagram.

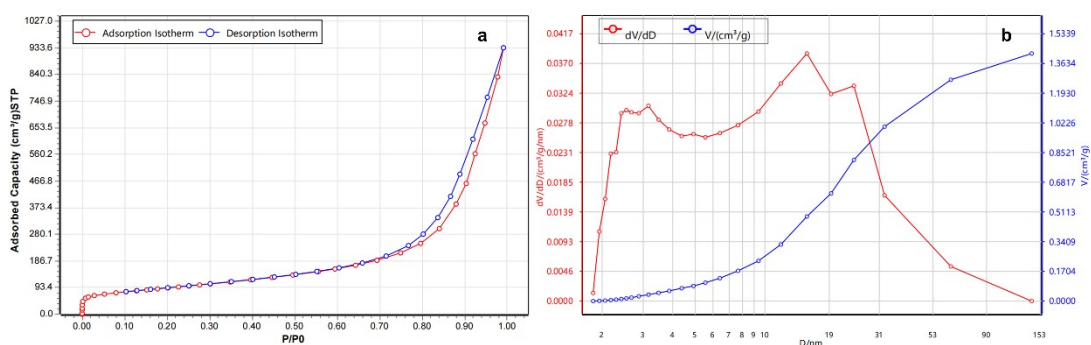

Figure S6: BET experiments of nanodiamonds: (a)  $N_2$  adsorption and desorption isotherm linear plot; (b) Pore volume and pore size curve measured by BJH adsorption method.

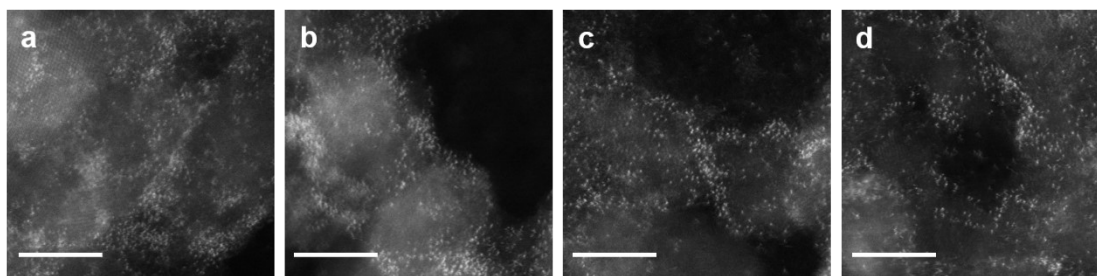

Figure. S7 Several examples of the distribution of uranyl ions adsorbed by nanodiamonds in STEM-HAADF mode. Scale bar = 5 nm

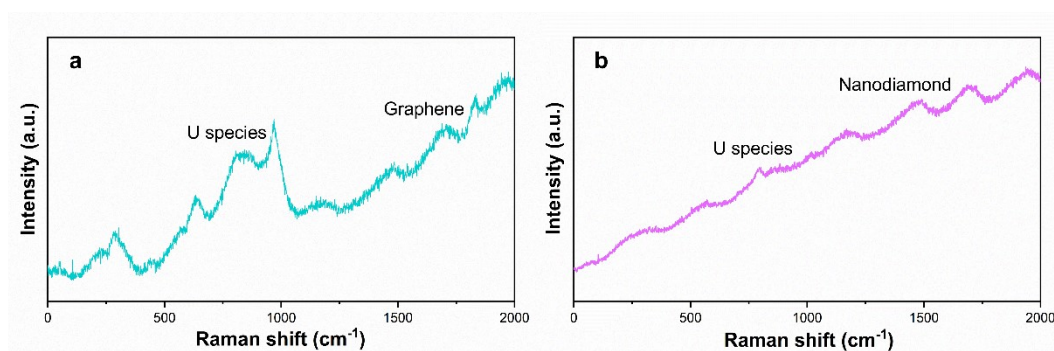

Figure S8: Raman spectra of uranium adsorption by (a): Graphene and (b): Nanodiamonds

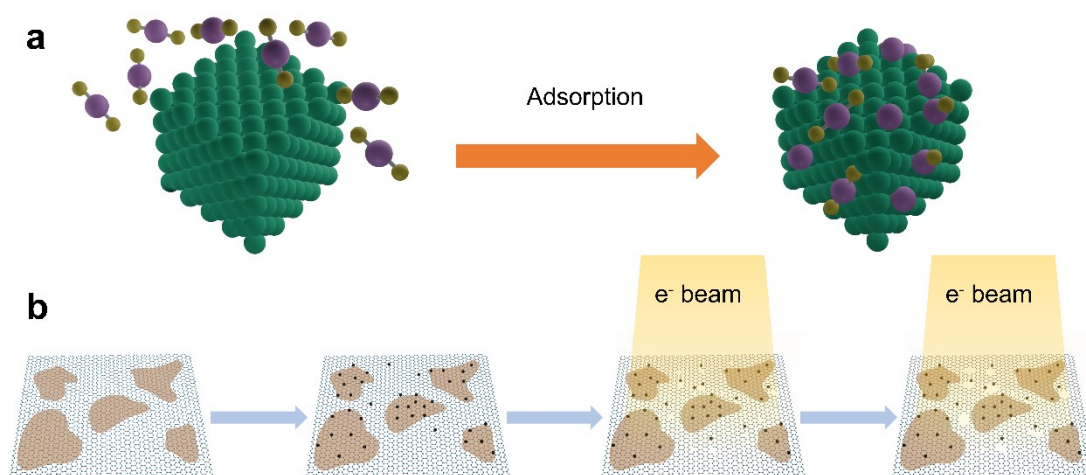

Figure S9: Schematic diagram of uranium adsorption by: (a) nanodiamond system and (b) graphene system.

Table S1: Relative mass content of elements after adsorption of uranium by carbonaceous materials analyzed by TEM eds mapping.

| Material    | C     | N    | O     | U    |
|-------------|-------|------|-------|------|
| Graphene    | 83.46 | 0.56 | 15.17 | 0.81 |
| Nanodiamond | 86.39 | 1.36 | 6.33  | 5.92 |

Table S2: Uranium interactions with different carbon allotropes

| Material         | Uranium Species | Binding Site                        | Irradiation Response       |
|------------------|-----------------|-------------------------------------|----------------------------|
| Graphene         | Single atom     | Hollow/top site of graphene/defects | Migration to edges/defects |
| Amorphous carbon | Single atom     | Amorphous regions only              | Limited migration          |
| Nanodiamond      | Uranyl ions     | Oxygen-containing functional groups | No dissociation            |
